# Supplementary material for: Think globally, act locally: Phylodynamic reconstruction of infectious bronchitis virus (IBV) QX genotype (GI-19 lineage) reveals different population dynamics and spreading patterns when evaluated on different epidemiological scales
Source: PubMed Central journal article supplement (PMC5589226; doi:10.1371/journal.pone.0184401), 2017-09-07

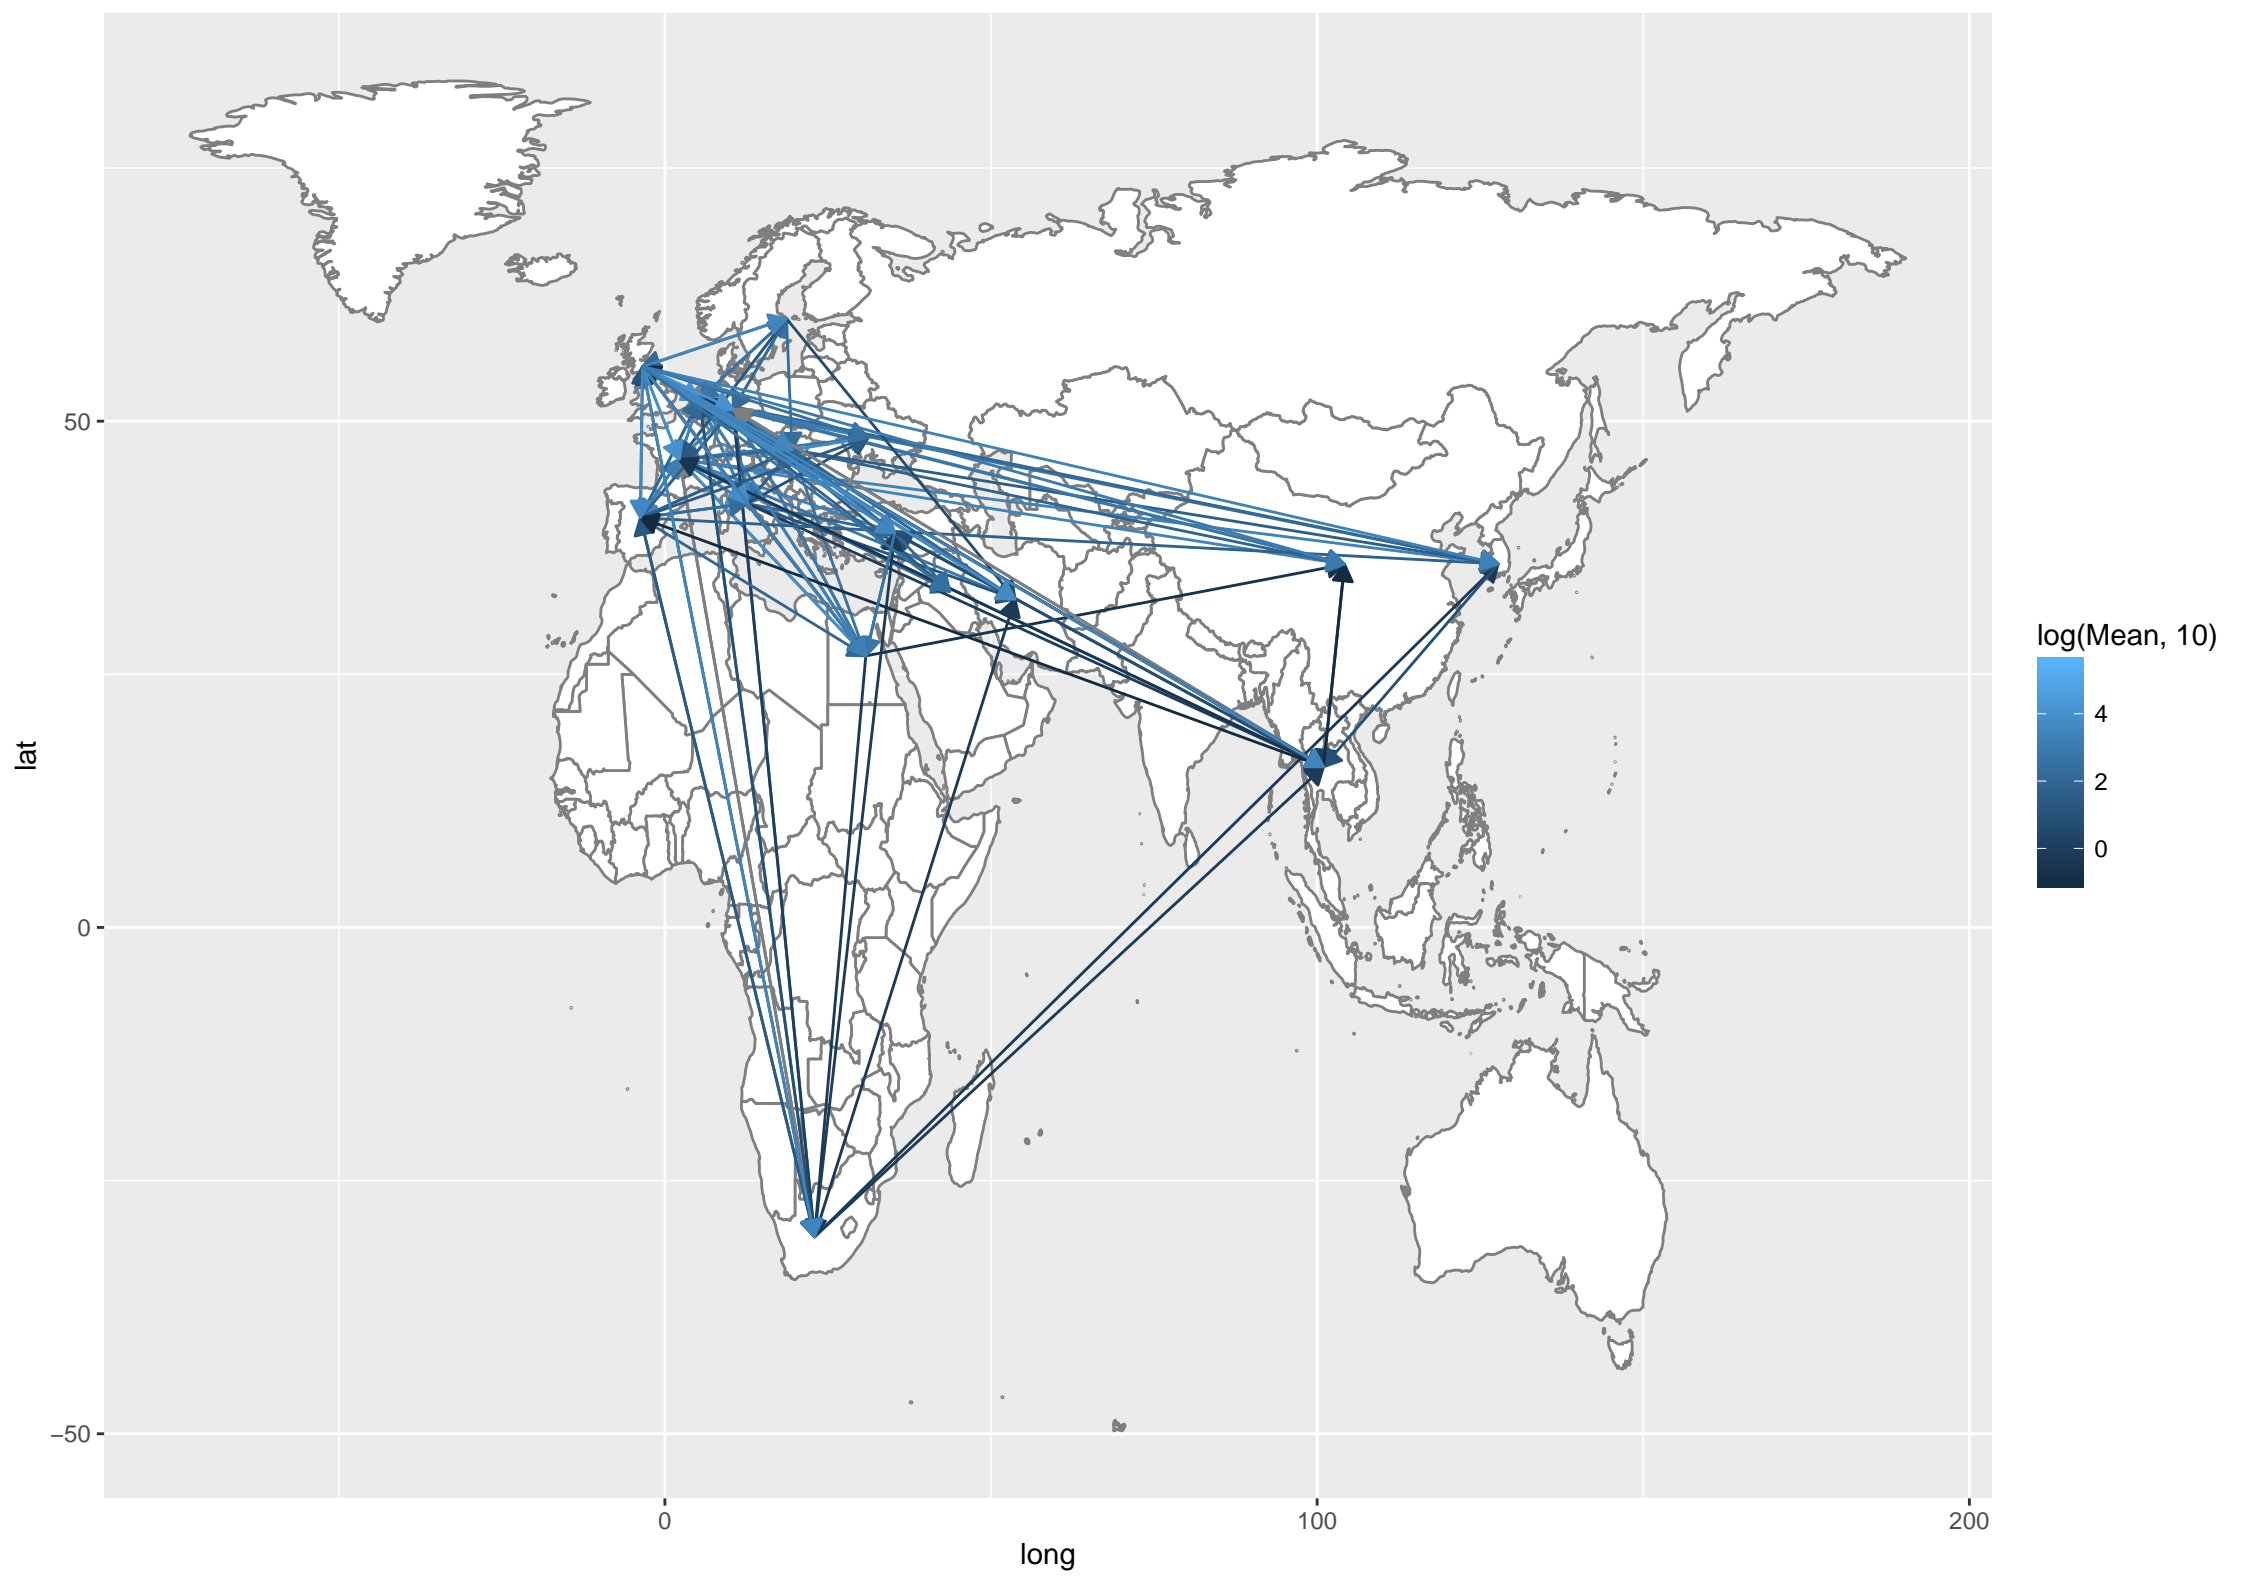

Supplement: pone.0184401.s004.pdf [file pone.0184401.s004.pdf]
